# Supplementary material for: COVID-19 and the Change in Lifestyle: Bodyweight, Time Allocation, and Food Choices
Source: MDPI journal article supplement (doi:10.3390/ijerph181910552), 2021-10-08
Supplement: s1 [file s1]

## Supplementary Materials

**Table S1.** VIF value for Bodyweights and Time Allocation

| Variable                         | $\Delta$ Weight<br>t1 | $\Delta$ Weight<br>t2 | $\Delta$ Exercise<br>time t1 | $\Delta$ Exercise<br>time t2 | $\Delta$ Entertainment<br>time t1 | $\Delta$ Entertainment<br>time t2 |
|----------------------------------|-----------------------|-----------------------|------------------------------|------------------------------|-----------------------------------|-----------------------------------|
| Risk aversion                    | 1.05                  | 1.05                  | 1.06                         | 1.05                         | 1.06                              | 1.06                              |
| Fear of resurgence               | 1.06                  | 1.06                  | 1.07                         | 1.07                         | 1.08                              | 1.08                              |
| Size of social network           | 1.23                  | 1.21                  | 1.24                         | 1.22                         | 1.24                              | 1.22                              |
| Confirmed case                   | 4.85                  | 5.47                  | 4.86                         | 5.48                         | 4.88                              | 5.48                              |
| Search frequency                 | 2.45                  | 2.53                  | 2.46                         | 2.53                         | 2.46                              | 2.54                              |
| Lockdown duration                | 1.11                  | 1.10                  | 1.45                         | 1.46                         | 1.45                              | 1.47                              |
| Package delivery restriction     |                       |                       | 1.41                         | 1.41                         | 1.41                              | 1.41                              |
| Duration of COVID                |                       |                       |                              |                              | 1.06                              | 1.07                              |
| Experience starvation            |                       |                       |                              |                              | 1.11                              | 1.12                              |
| Stores nearby                    |                       |                       | 1.08                         | 1.08                         | 1.08                              | 1.08                              |
| Women                            | 1.09                  | 1.09                  | 1.09                         | 1.09                         | 1.10                              | 1.09                              |
| Age                              | 1.42                  | 1.41                  | 1.43                         | 1.41                         | 1.44                              | 1.42                              |
| Married                          | 1.55                  | 1.55                  | 1.56                         | 1.55                         | 1.56                              | 1.55                              |
| Education                        | 1.27                  | 1.27                  | 1.28                         | 1.28                         | 1.28                              | 1.28                              |
| Health status                    | 1.14                  | 1.14                  | 1.14                         | 1.14                         | 1.14                              | 1.14                              |
| Income                           | 1.26                  | 1.26                  | 1.26                         | 1.26                         | 1.28                              | 1.28                              |
| Family size                      | 1.39                  | 1.40                  | 1.40                         | 1.40                         | 1.40                              | 1.40                              |
| Either child or elderly at home  | 1.61                  | 1.61                  | 1.62                         | 1.62                         | 1.62                              | 1.62                              |
| Household member a medical staff | 1.09                  | 1.09                  | 1.09                         | 1.09                         | 1.13                              | 1.13                              |

**Table S2.** VIF value for Food Choices

| Variable                         | $\Delta$ Online food<br>Purchase t1 | $\Delta$ Online food<br>Purchase t2 | $\Delta$ Snack<br>Purchase t1 | $\Delta$ Snack<br>Purchase t2 |
|----------------------------------|-------------------------------------|-------------------------------------|-------------------------------|-------------------------------|
| Risk aversion                    | 1.05                                | 1.05                                | 1.05                          | 1.05                          |
| Fear of resurgence               | 1.07                                | 1.07                                | 1.08                          | 1.08                          |
| Size of social network           | 1.24                                | 1.22                                | 1.23                          | 1.22                          |
| Confirmed case                   | 4.89                                | 5.50                                | 4.87                          | 5.47                          |
| Search frequency                 | 2.46                                | 2.53                                | 2.46                          | 2.53                          |
| Lockdown duration                | 1.45                                | 1.45                                | 1.46                          | 1.47                          |
| Package delivery restriction     | 1.41                                | 1.41                                | 1.41                          | 1.41                          |
| Duration of COVID                |                                     |                                     | 1.06                          | 1.07                          |
| Diagnosed                        | 1.15                                | 1.16                                |                               |                               |
| $\Delta$ Price                   |                                     |                                     | 1.25                          | 1.12                          |
| Women                            | 1.09                                | 1.09                                | 1.09                          | 1.09                          |
| Age                              | 1.43                                | 1.42                                | 1.44                          | 1.42                          |
| Married                          | 1.55                                | 1.55                                | 1.56                          | 1.55                          |
| Education                        | 1.28                                | 1.28                                | 1.28                          | 1.28                          |
| Health status                    | 1.14                                | 1.14                                | 1.14                          | 1.14                          |
| Income                           | 1.26                                | 1.26                                | 1.26                          | 1.26                          |
| Family size                      | 1.40                                | 1.40                                | 1.41                          | 1.40                          |
| Either child or elderly at home  | 1.62                                | 1.62                                | 1.62                          | 1.62                          |
| Household member a medical staff | 1.17                                | 1.17                                | 1.12                          | 1.12                          |
